# Supplementary material for: Equilibrium line altitudes of alpine glaciers in Alaska suggest Last Glacial Maximum summer temperature was 2–5 °C lower than during the pre-industrial
Source: Copernicus journal article supplement (doi:10.5194/cp-20-91-2024), 2024-01-11
Supplement: Supplementary file 1 [file cp-20-91-2024-supplement.zip]

Archive with 5 entries (5 files):
- glacier_shapefiles.zip
- Table S1.xlsx
- Walcott_et_al_2023_supplementary_shp_info.docx
- cp-20-91-2024-supplement-title-page.pdf
- Walcott_et_al_2023_supplemental_figures_captions.docx
