# Supplementary material for: Equilibrium line altitudes of alpine glaciers in Alaska suggest Last Glacial Maximum summer temperature was 2–5 °C lower than during the pre-industrial
Source: Copernicus journal article supplement (doi:10.5194/cp-20-91-2024), 2024-01-11
Supplement: Supplementary file 1 [file cp-20-91-2024-supplement.zip › cp-20-91-2024-supplement-title-page.pdf]

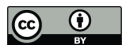

*Supplement of*

**Equilibrium line altitudes of alpine glaciers in Alaska suggest  
Last Glacial Maximum summer temperature was 2–5 °C  
lower than during the pre-industrial**

**Caleb K. Walcott et al.**

*Correspondence to:* Caleb K. Walcott (ckwalcot@buffalo.edu)

- cp-20-91-2024-supplement-title-page.pdf
- Table S1.xlsx
- Walcott\_et\_al\_2023\_supplemental\_figures\_captions.docx
- Walcott\_et\_al\_2023\_supplementary\_shp\_info.docx
- glacier\_shapefiles.zip

The copyright of individual parts of the supplement might differ from the article licence.
