# Supplementary material for: Equilibrium line altitudes of alpine glaciers in Alaska suggest Last Glacial Maximum summer temperature was 2–5 °C lower than during the pre-industrial
Source: Copernicus journal article supplement (doi:10.5194/cp-20-91-2024), 2024-01-11
Supplement: Supplementary file 1 [file Table S1.xlsx]

## Sheet: LGM ELA data
Mountain ranges and sub-ranges within are sorted alphabetically (except for the Alaska Range where they are sorted west to east). Glaciers in each range are sorted East to West by longitude (X-coordinate; column C). a.) ID number assigned to each glacier. b.) Unofficial reference name given to each glacier in this study. c.) glacier surface area in m^2 d.) x-coordinate (longitude) in NAD83/Alaska…
ID number a	Glacier name (unofficial) b	Area (m^2) c	X (m) d	Y (m) e	ELA_LGM AAR (m asl) f	ELA_LGM AABR (m asl) g	Range/sub-range mean AAR (m asl)	AAR standard deviation (m)	Range/sub-range mean AABR (m asl)	AABR standard deviation (m)
AHKLUN MOUNTAINS							471.696	117.318	469.957	115.53
001	Ahklun Mts. 01	604145	-464687	987737	336	338
002	Ahklun Mts. 02	388744	-464183	988550	436	428
003	Ahklun Mts. 03	858999	-463041	988280	420	422
004	Ahklun Mts. 04	1.85822e+06	-432156	1.07635e+06	293	306
005	Ahklun Mts. 05	477765	-429549	1.07635e+06	456	458
006	Ahklun Mts. 06	1.11066e+06	-428545	1.05177e+06	429	432
007	Ahklun Mts. 07	1.56198e+06	-427807	1.05396e+06	375	368
008	Ahklun Mts. 08	551579	-427733	1.05068e+06	478	470
009	Ahklun Mts. 09	544648	-426831	1.05183e+06	339	356
010	Ahklun Mts. 10	898159	-425457	1.05453e+06	422	420
011	Ahklun Mts. 11	1.08542e+06	-423598	1.05523e+06	311	314
012	Ahklun Mts. 12	552853	-422572	1.05419e+06	428	420
013	Ahklun Mts. 13	1.17175e+06	-415697	1.06262e+06	409	392
014	Ahklun Mts. 14	763828	-414534	1.06374e+06	432	424
015	Ahklun Mts. 15	1.0211e+06	-413867	1.06221e+06	428	426
016	Ahklun Mts. 16	1.19899e+06	-413852	1.06399e+06	407	404
017	Ahklun Mts. 17	1.08411e+06	-408917	1.06614e+06	509	502
018	Ahklun Mts. 18	1.22657e+06	-408779	1.06952e+06	531	524
019	Ahklun Mts. 19	1.18793e+06	-408689	1.06761e+06	459	462
020	Ahklun Mts. 20	8.75256e+06	-407526	1.07028e+06	485	472
021	Ahklun Mts. 21	487663	-407370	1.0926e+06	502	500
022	Ahklun Mts. 22	672952	-405496	1.07008e+06	312	310
023	Ahklun Mts. 23	3.48164e+06	-404321	1.07314e+06	467	464
024	Ahklun Mts. 24	2.44956e+06	-403144	1.09203e+06	514	506
025	Ahklun Mts. 25	1.38902e+06	-383406	1.06303e+06	396	398
026	Ahklun Mts. 26	1.12072e+06	-382379	1.06218e+06	475	472
027	Ahklun Mts. 27	872460	-379730	1.04626e+06	369	376
028	Ahklun Mts. 28	1.29162e+06	-379373	1.03819e+06	396	414
029	Ahklun Mts. 29	1.14061e+06	-378779	1.03933e+06	380	378
030	Ahklun Mts. 30	1.61726e+06	-377788	1.03755e+06	419	412
031	Ahklun Mts. 31	1.02842e+06	-377025	1.0389e+06	379	382
032	Ahklun Mts. 32	531049	-375181	1.09615e+06	600	598
033	Ahklun Mts. 33	624646	-374084	1.09654e+06	630	618
034	Ahklun Mts. 34	654065	-373619	1.05802e+06	375	368
035	Ahklun Mts. 35	685777	-373503	1.051e+06	413	416
036	Ahklun Mts. 36	748729	-372574	1.09842e+06	545	538
037	Ahklun Mts. 37	547286	-372285	1.05142e+06	428	426
038	Ahklun Mts. 38	279955	-372144	1.09421e+06	538	530
039	Ahklun Mts. 39	291905	-371392	1.09416e+06	537	540
040	Ahklun Mts. 40	369649	-371179	1.05233e+06	391	394
041	Ahklun Mts. 41	3.18048e+06	-360211	1.13303e+06	711	734
042	Ahklun Mts. 42	1.80806e+06	-357153	1.13258e+06	697	700
043	Ahklun Mts. 43	982513	-355698	1.12711e+06	659	652
044	Ahklun Mts. 44	1.8269e+06	-355270	1.12482e+06	683	680
045	Ahklun Mts. 45	3.2676e+06	-354952	1.13565e+06	754	736
046	Ahklun Mts. 46	351881	-354776	1.12297e+06	745	738
ALASKA RANGE							1237.45	174.336	1266.38	166.242
WESTERN ALASKA RANGE							1058.17	76.3398	1078.67	64.2049
047	Western Alaska Range 01	1.19411e+08	-21179.3	1.29698e+06	1075	1078
048	Western Alaska Range 02	1.19978e+07	-19605.7	1.3694e+06	929	977
049	Western Alaska Range 03	1.24006e+07	-18442.8	1.26372e+06	1010	1033
050	Western Alaska Range 04	104837998	-17834.2	1.25691e+06	1103	1106
051	Western Alaska Range 05	3.21534e+08	-16873.2	1.26685e+06	1092	1130
052	Western Alaska Range 06	5.4026e+08	-16220.8	1.28469e+06	1140	1148
CENTRAL ALASKA RANGE							1267	144.857	1326.82	127.138
053	Central Alaska Range 01	8.08901e+07	62156	1.41256e+06	1249	1207
054	Central Alaska Range 02	3.49501e+07	93125.7	1.43868e+06	1080	1218
055	Central Alaska Range 03	2.85821e+08	101947	1.44357e+06	1238	1311
056	Central Alaska Range 04	2.69946e+08	111967	1.46125e+06	1144	1262
057	Central Alaska Range 05	183709759	124257	1.47336e+06	1092	1220
058	Central Alaska Range 06	43747174	157791	1.48199e+06	1254	1272
059	Central Alaska Range 07	4.93897e+07	162584	1.48288e+06	1285	1298
060	Central Alaska Range 08	9.0198e+06	198564	1.52935e+06	1196	1254
061	Central Alaska Range 09	6.94898e+06	207722	1.50725e+06	1422	1490
062	Central Alaska Range 10	3.63365e+07	210186	1.50707e+06	1477	1535
063	Central Alaska Range 11	5.15057e+07	214482	1.50827e+06	1500	1528
EASTERN ALASKA RANGE							1256.69	178.867	1278.21	168.639
064	Eastern Alaska Range 01	4.90346e+07	285930	1.56244e+06	1432	1405
065	Eastern Alaska Range 02	1.66166e+08	322952	1.55165e+06	1587	1565
066	Eastern Alaska Range 03	1.96208e+07	336739	1.55249e+06	1364	1432
067	Eastern Alaska Range 04	4.38804e+08	368872	1.54889e+06	1485	1533
068	Eastern Alaska Range 05	1.23671e+08	412592	1.54105e+06	1357	1370
069	Eastern Alaska Range 06	2.73276e+06	416979	1.56297e+06	979	987
070	Eastern Alaska Range 07	5.47582e+07	417964	1.55837e+06	1219	1202
071	Eastern Alaska Range 08	5.94754e+06	420120	1.56416e+06	1059	1052
072	Eastern Alaska Range 09	2.22899e+07	424726	1.56607e+06	808	916
073	Eastern Alaska Range 10	2.1321e+07	429391	1.55906e+06	986	1044
074	Eastern Alaska Range 11	2.61569e+08	430100	1.54402e+06	1290	1298
075	Eastern Alaska Range 12	1.16299e+07	462030	1.55064e+06	911	909
076	Eastern Alaska Range 13	3.927e+07	467138	1.54556e+06	1131	1244
077	Eastern Alaska Range 14	4.52694e+07	472819	1.5406e+06	1290	1390
078	Eastern Alaska Range 15	1.7645e+07	477613	1.53583e+06	1441	1484
079	Eastern Alaska Range 16	1190182682	481718	1.52205e+06	1515	1453
080	Eastern Alaska Range 17	1.0897e+07	508414	1.52544e+06	1326	1264
081	Eastern Alaska Range 18	1.29914e+07	511461	1.52432e+06	1195	1178
082	Eastern Alaska Range 19	6.36624e+07	517706	1.52309e+06	1120	1173
083	Eastern Alaska Range 20	2.68669e+06	519687	1.52719e+06	1106	1104
084	Eastern Alaska Range 21	4.50666e+06	521551	1.52579e+06	1286	1284
085	Eastern Alaska Range 22	4.43038e+06	522915	1.52487e+06	1343	1336
086	Eastern Alaska Range 23	4.52688e+06	524251	1.52374e+06	1341	1324
087	Eastern Alaska Range 24	3.79051e+06	525408	1.52244e+06	1258	1301
088	Eastern Alaska Range 25	1.6927e+06	528756	1.5212e+06	1211	1289
089	Eastern Alaska Range 26	1.73323e+06	530053	1.52109e+06	1101	1154
090	Eastern Alaska Range 27	1.03313e+06	530773	1.52003e+06	1277	1275
091	Eastern Alaska Range 28	1.92559e+06	532166	1.52024e+06	1024	1072
092	Eastern Alaska Range 29	5.11533e+06	533220	1.51888e+06	1085	1083
093	Eastern Alaska Range 30	3.10895e+07	601270	1.43988e+06	1413	1426
094	Eastern Alaska Range 31	2.68423e+07	606247	1.43797e+06	1437	1460
095	Eastern Alaska Range 32	9.49797e+06	609648	1.43777e+06	1320	1313
096	Eastern Alaska Range 33	5.60915e+06	612446	1.4377e+06	1232	1225
097	Eastern Alaska Range 34	2.42623e+06	638069	1.42841e+06	1227	1275
098	Eastern Alaska Range 35	5.96681e+06	639661	1.42733e+06	1290	1313
099	Eastern Alaska Range 36	7.08388e+06	649377	1.42462e+06	1229	1307
100	Eastern Alaska Range 37	9.54074e+06	653166	1.42326e+06	1337	1410
101	Eastern Alaska Range 38	1.40537e+07	657642	1.42104e+06	1439	1457
102	Eastern Alaska Range 39	1.33704e+07	663087	1.41926e+06	1560	1543
BEAVER MOUNTAINS							824.562	76.4931	818.5	72.1905
103	Beaver Mts. 01	825775	-156150	1441217	923	926
104	Beaver Mts. 02	1692795	-155175	1441658	828	830
105	Beaver Mts. 03	1290550	-153362	1436560	895	882
106	Beaver Mts. 04	2333932	-153151	1442339	923	910
107	Beaver Mts. 05	4419341	-152711	1444351	908	890
108	Beaver Mts. 06	3371771	-152160	1439901	789	782
109	Beaver Mts. 07	2248332	-151503	1434476	766	744
110	Beaver Mts. 08	1199805	-150003	1438893	703	716
111	Beaver Mts. 09	12780551	-149393	1444003	887	870
112	Beaver Mts. 10	3982141	-149159	1437785	751	748
113	Beaver Mts. 11	2898235	-148745	1430925	826	804
114	Beaver Mts. 12	1955612	-148446	1435859	821	814
115	Beaver Mts. 13	2954541	-147016	1433846	735	728
116	Beaver Mts. 14	5651513	-146836	1442553	910	908
117	Beaver Mts. 15	5868777	-146428	1431509	814	812
118	Beaver Mts. 16	1134399	-141996	1430127	714	732
BENDELEBEN MOUNTAINS							656.714	92.4365	657.071	91.8703
119	Bendeleben Mts. 01	1850520	-457927	1720840	609	602
120	Bendeleben Mts. 02	1617670	-456505	1724330	555	558
121	Bendeleben Mts. 03	1479490	-456118	1721930	505	498
122	Bendeleben Mts. 04	2138810	-455069	1720270	591	588
123	Bendeleben Mts. 05	394860	-448488	1726760	594	596
124	Bendeleben Mts. 06	1230520	-447342	1727710	629	636
125	Bendeleben Mts. 07	470834	-446890	1724230	633	636
126	Bendeleben Mts. 08	377895	-446217	1724300	550	548
127	Bendeleben Mts. 09	1072310	-445283	1724230	497	500
128	Bendeleben Mts. 10	1057810	-444333	1724430	493	500
129	Bendeleben Mts. 11	469518	-422923	1732620	685	692
130	Bendeleben Mts. 12	911033	-421951	1732610	612	614
131	Bendeleben Mts. 13	659683	-421196	1727850	679	682
132	Bendeleben Mts. 14	388589	-419385	1731160	821	814
133	Bendeleben Mts. 15	1133060	-415604	1730570	706	698
134	Bendeleben Mts. 16	824212	-414211	1732110	597	600
135	Bendeleben Mts. 17	1768820	-414210	1730660	749	746
136	Bendeleben Mts. 18	1172260	-412411	1723040	599	602
137	Bendeleben Mts. 19	453567	-411520	1723050	666	658
138	Bendeleben Mts. 20	2052980	-411403	1728340	703	700
139	Bendeleben Mts. 21	478801	-410988	1725350	679	686
140	Bendeleben Mts. 22	409214	-410816	1722530	653	656
141	Bendeleben Mts. 23	366506	-410008	1728550	792	804
142	Bendeleben Mts. 24	1260670	-409564	1727210	757	754
143	Bendeleben Mts. 25	229594	-407676	1729210	764	756
144	Bendeleben Mts. 26	370906	-406991	1728570	731	734
145	Bendeleben Mts. 27	583187	-406572	1728020	776	774
146	Bendeleben Mts. 28	442585	-405530	1727770	763	766
BROOKS RANGE							784.143	239.72	784.754	239.764
ANGAYUCHAM MOUNTAINS							786.286	101.567	790.571	99.3292
147	Angayucham Mts. 01	412230	-88830	1.88729e+06	716	734
148	Angayucham Mts. 02	624688	-88315.4	1.89214e+06	651	664
149	Angayucham Mts. 03	669935	-86854.1	1.8913e+06	694	702
150	Angayucham Mts. 04	1.82718e+06	-86317.2	1.88806e+06	857	850
151	Angayucham Mts. 05	249786	-85712	1.88629e+06	907	924
152	Angayucham Mts. 06	1.13176e+06	-78240.6	1.88439e+06	889	892
153	Angayucham Mts. 07	1.53996e+06	-75791.4	1.89212e+06	790	768
BAIRD MOUNTAINS							667.865	122.095	670.649	120.123
154	Baird Mts. 01	1.27611e+06	-314403	1.9764e+06	711	704
155	Baird Mts. 02	1.64711e+06	-268908	1.93214e+06	597	600
156	Baird Mts. 03	796821	-266786	1.94644e+06	653	650
157	Baird Mts. 04	726492	-264896	1.9395e+06	628	626
158	Baird Mts. 05	500636	-229885	1.98065e+06	1038	1030
159	Baird Mts. 06	367835	-229347	1.98176e+06	1028	1030
160	Baird Mts. 07	288937	-228283	1.98118e+06	928	930
161	Baird Mts. 08	448367	-226490	1.94958e+06	638	630
162	Baird Mts. 09	1.18287e+06	-225172	1.95226e+06	684	676
163	Baird Mts. 10	305321	-221018	1.94891e+06	558	566
164	Baird Mts. 11	366048	-213961	1.96014e+06	612	620
165	Baird Mts. 12	150120	-212185	1.95613e+06	667	684
166	Baird Mts. 13	301462	-212135	1.95267e+06	703	700
167	Baird Mts. 14	110518	-211622	1.96592e+06	813	836
168	Baird Mts. 15	552047	-207712	1.94873e+06	599	586
169	Baird Mts. 16	234798	-207696	1.95049e+06	586	594
170	Baird Mts. 17	424106	-206843	1.94767e+06	577	570
171	Baird Mts. 18	376238	-205862	1.95921e+06	683	680
172	Baird Mts. 19	285317	-204848	1.95817e+06	600	598
173	Baird Mts. 20	506785	-203801	1.96315e+06	679	676
174	Baird Mts. 21	535227	-201884	1.9558e+06	607	600
175	Baird Mts. 22	413727	-200244	1.95394e+06	633	636
176	Baird Mts. 23	505033	-198968	1.95117e+06	472	490
177	Baird Mts. 24	430358	-192240	1.94814e+06	515	522
178	Baird Mts. 25	1.02502e+06	-188648	1.95344e+06	595	592
179	Baird Mts. 26	343500	-187480	1.95475e+06	578	590
180	Baird Mts. 27	534502	-186662	1.95407e+06	625	628
181	Baird Mts. 28	1.58586e+06	-182294	1.95162e+06	664	662
182	Baird Mts. 29	814517	-180743	1.95097e+06	649	652
183	Baird Mts. 30	666454	-176889	1.94579e+06	588	590
184	Baird Mts. 31	363389	-176621	1.94868e+06	707	704
185	Baird Mts. 32	1.00004e+06	-171929	1.9434e+06	564	566
186	Baird Mts. 33	1.38578e+06	-169025	1.94601e+06	579	652
187	Baird Mts. 34	505283	-167420	1.94578e+06	765	758
188	Baird Mts. 35	190800	-166598	1.94578e+06	742	740
189	Baird Mts. 36	457795	-158121	1.95011e+06	708	706
190	Baird Mts. 37	372168	-148668	1.94924e+06	738	740
DELONG MOUNTAINS							827	127.779	823.707	128.147
191	Delong Mts. 01	938988	-355885	2.06303e+06	764	756
192	Delong Mts. 02	928936	-354059	2.06615e+06	653	656
193	Delong Mts. 03	811865	-352005	2.06717e+06	782	760
194	Delong Mts. 04	4.13532e+06	-349361	2.06993e+06	706	694
195	Delong Mts. 05	3.67606e+06	-343117	2.07249e+06	705	702
196	Delong Mts. 06	305056	-336320	2.04984e+06	877	870
197	Delong Mts. 07	431345	-335414	2.05013e+06	753	746
198	Delong Mts. 08	443059	-334579	2.05145e+06	758	750
199	Delong Mts. 09	1.10339e+06	-334570	2.04894e+06	684	686
200	Delong Mts. 10	338161	-332377	2.05146e+06	800	802
201	Delong Mts. 11	455821	-331621	2.04905e+06	770	772
202	Delong Mts. 12	3.45102e+06	-329768	2.05065e+06	737	720
203	Delong Mts. 13	214743	-328867	2.04703e+06	807	804
204	Delong Mts. 14	1.00537e+06	-328583	2.04933e+06	675	668
205	Delong Mts. 15	359840	-328539	2.04821e+06	703	696
206	Delong Mts. 16	702593	-328038	2.05659e+06	786	778
207	Delong Mts. 17	570277	-327061	2.05666e+06	850	852
208	Delong Mts. 18	635458	-326036	2.06066e+06	773	770
209	Delong Mts. 19	609228	-320088	2.05174e+06	732	730
210	Delong Mts. 20	1.00588e+06	-295405	2.04568e+06	915	912
211	Delong Mts. 21	2.94678e+06	-295053	2.04951e+06	669	656
212	Delong Mts. 22	7.4545e+06	-291640	2.04694e+06	774	762
213	Delong Mts. 23	530209	-281941	2.06625e+06	824	846
214	Delong Mts. 24	9.92375e+06	-280292	2.05222e+06	860	852
215	Delong Mts. 25	520366	-280242	2.06749e+06	930	928
216	Delong Mts. 26	288913	-279634	2.06818e+06	913	920
217	Delong Mts. 27	4.99912e+06	-277308	2.05702e+06	877	874
218	Delong Mts. 28	9.06921e+06	-275640	2.06049e+06	802	804
219	Delong Mts. 29	399509	-274981	2.03936e+06	685	698
220	Delong Mts. 30	1.17356e+07	-273526	2.05239e+06	820	828
221	Delong Mts. 31	411172	-272082	2.0398e+06	777	764
222	Delong Mts. 32	4.86235e+06	-271069	2.06034e+06	900	898
223	Delong Mts. 33	5.92914e+06	-268911	2.04026e+06	733	736
224	Delong Mts. 34	273118	-259045	2.07878e+06	1001	1004
225	Delong Mts. 35	385185	-258903	2.0796e+06	1041	1034
226	Delong Mts. 36	272424	-257938	2.08146e+06	1258	1260
227	Delong Mts. 37	457093	-189858	2.04927e+06	1016	1008
228	Delong Mts. 38	408131	-188003	2.04911e+06	1031	1028
229	Delong Mts. 39	1.00401e+06	-186569	2.04894e+06	976	958
230	Delong Mts. 40	917527	-185002	2.04832e+06	1004	992
231	Delong Mts. 41	3.7207e+06	-178295	2.04907e+06	786	798
ENDICOTT MOUNTAINS							1463.5	12.0208	1463	1.41421
232	Endicott Mts. 01	3.18925e+06	130389	2.03888e+06	1455	1462
233	Endicott Mts. 02	1.41611e+07	132943	2.0393e+06	1472	1464
JADE MOUNTAINS							618.714	25.9211	619.857	25.3931
234	Jade Mts. 01	254334	-180346	1.92601e+06	610	618
235	Jade Mts. 02	488114	-177950	1.92522e+06	661	658
236	Jade Mts. 03	626791	-175250	1.9264e+06	646	648
237	Jade Mts. 04	305594	-173761	1.92614e+06	593	596
238	Jade Mts. 05	271241	-173209	1.92522e+06	612	610
239	Jade Mts. 06	474114	-172601	1.92491e+06	617	620
240	Jade Mts. 07	272444	-171263	1.92303e+06	592	589
POSS MOUNTAIN							-	-	-	-
241	Poss Mt. 01	1.17595e+06	185371	1.94814e+06	1282	1290
ROMANZOF MOUNTAINS							1502.8	219.378	1518.8	209.598
242	Romanzof Mts. 01	5.55575e+06	401346	2.18393e+06	1614	1596
243	Romanzof Mts. 02	521588	432430	2.15475e+06	1745	1742
244	Romanzof Mts. 03	2.35494e+06	436941	2.16165e+06	1420	1452
245	Romanzof Mts. 04	1.22199e+06	437213	2.15923e+06	1565	1612
246	Romanzof Mts. 05	8.84408e+06	455978	2.18006e+06	1170	1192
SCHWATKA MOUNTAINS							637.045	88.2127	637.818	84.3663
247	Schwatka Mts. 01	360564	-140831	1.9416e+06	547	544
248	Schwatka Mts. 02	292511	-140195	1.94136e+06	625	618
249	Schwatka Mts. 03	771417	-138840	1.94079e+06	582	548
250	Schwatka Mts. 04	543832	-137683	1.94067e+06	565	568
251	Schwatka Mts. 05	629984	-137002	1.94004e+06	583	606
252	Schwatka Mts. 06	1.28676e+06	-135980	1.94002e+06	640	638
253	Schwatka Mts. 07	1.31989e+06	-131535	1.92933e+06	544	562
254	Schwatka Mts. 08	869196	-130873	1.93046e+06	693	696
255	Schwatka Mts. 09	898554	-130217	1.93627e+06	553	576
256	Schwatka Mts. 10	779403	-129599	1.93613e+06	608	590
257	Schwatka Mts. 11	805049	-128552	1.93633e+06	567	570
258	Schwatka Mts. 12	1.10778e+06	-127413	1.93648e+06	546	568
259	Schwatka Mts. 13	682072	-121270	1.93661e+06	638	646
260	Schwatka Mts. 14	422992	-121188	1.93146e+06	584	592
261	Schwatka Mts. 15	1.0446e+06	-119896	1.93675e+06	650	648
262	Schwatka Mts. 16	434667	-119707	1.93087e+06	737	704
263	Schwatka Mts. 17	1.34071e+06	-117826	1.93687e+06	642	644
264	Schwatka Mts. 18	1.35424e+06	-116561	1.93613e+06	623	636
265	Schwatka Mts. 19	530567	-116555	1.93398e+06	900	898
266	Schwatka Mts. 20	2.96049e+06	-115762	1.92924e+06	694	686
267	Schwatka Mts. 21	559717	-111117	1.94334e+06	721	724
268	Schwatka Mts. 22	2.52151e+06	-104593	1.91877e+06	773	770
SHUBLIK MOUNTAINS							-	-	-	-
269	Shublik Mt. 01	1.7226e+06	336164	2.1926e+06	1282	1250
THIRD RANGE							1109.67	68.0172	1109.33	70.0095
270	Third Range 01	194835	338522	2.1841e+06	1182	1180
271	Third Range 02	435006	340365	2.18526e+06	1100	1108
272	Third Range 03	1.01997e+06	341487	2.18536e+06	1047	1040
CHUILNUK MOUNTAINS							637.429	36.0364	637.143	36.6944
273	Chuilnuk Mts. 01	6.19145e+06	-209105	1.26832e+06	664	676
274	Chuilnuk Mts. 02	9.95641e+06	-206693	1.26844e+06	645	648
275	Chuilnuk Mts. 03	1.44163e+07	-203893	1.26913e+06	645	638
276	Chuilnuk Mts. 04	1.65919e+07	-201105	1.26814e+06	637	624
277	Chuilnuk Mts. 05	3.85154e+06	-200787	1.26377e+06	563	566
278	Chuilnuk Mts. 06	7.99124e+06	-198724	1.26704e+06	633	636
279	Chuilnuk Mts. 07	2.41444e+06	-198231	1.26579e+06	675	672
DARBY MOUNTAINS							660.8	32.3141	655.6	28.7541
280	Darby Mts. 01	836684	-401606	1678070	681	674
281	Darby Mts. 02	2133650	-400879	1680770	693	686
282	Darby Mts. 03	1326240	-397999	1683190	675	668
283	Darby Mts. 04	912916	-395896	1688230	615	622
284	Darby Mts. 05	1317700	-394365	1689570	640	628
EEK MOUNTAINS							674.6	45.1032	676.4	28.8236
285	Eek Mts. 01	1.2143e+06	-360972	1.12694e+06	683	666
286	Eek Mts. 02	1.02094e+06	-359910	1.12773e+06	628	646
287	Eek Mts. 03	506397	-359353	1.12429e+06	628	656
288	Eek Mts. 04	1.62681e+06	-358519	1.13003e+06	725	708
289	Eek Mts. 05	1.4867e+06	-356824	1.12967e+06	709	706
INDIAN MOUNTAIN							-	-	-	-
290	Indian Mt. 01	372370	15753.4	1790650	862	858
KIGLUAIK MOUNTAINS							585.328	91.1061	580.922	90.1384
291	Kigluaik Mts. 01	549173	-569582	1711960	910	918
292	Kigluaik Mts. 02	734909	-569029	1715530	604	602
293	Kigluaik Mts. 03	2754500	-567587	1712850	674	672
294	Kigluaik Mts. 04	480836	-563578	1710870	814	812
295	Kigluaik Mts. 05	388691	-562549	1713520	677	680
296	Kigluaik Mts. 06	2448940	-562184	1710300	538	540
297	Kigluaik Mts. 07	1492510	-559447	1707140	571	568
298	Kigluaik Mts. 08	1122380	-558204	1714360	618	586
299	Kigluaik Mts. 09	4722980	-557127	1707660	484	496
300	Kigluaik Mts. 10	4691740	-556688	1712570	470	452
301	Kigluaik Mts. 11	1034640	-555620	1708530	507	504
302	Kigluaik Mts. 12	294751	-554871	1708850	535	548
303	Kigluaik Mts. 13	15415000	-554862	1715210	681	664
304	Kigluaik Mts. 14	863775	-553230	1707840	478	476
305	Kigluaik Mts. 15	9660360	-552542	1718700	624	596
306	Kigluaik Mts. 16	482985	-552538	1714120	623	626
307	Kigluaik Mts. 17	3399360	-550902	1719630	629	622
308	Kigluaik Mts. 18	987420	-550319	1712860	582	594
309	Kigluaik Mts. 19	720428	-550257	1708190	637	630
310	Kigluaik Mts. 20	1358900	-549505	1713630	554	546
311	Kigluaik Mts. 21	3231490	-549463	1720160	504	502
312	Kigluaik Mts. 22	1149880	-549104	1710290	434	446
313	Kigluaik Mts. 23	1033040	-547816	1708300	493	496
314	Kigluaik Mts. 24	907523	-547787	1715050	584	572
315	Kigluaik Mts. 25	1005260	-547396	1707050	531	528
316	Kigluaik Mts. 26	541151	-547011	1715400	588	586
317	Kigluaik Mts. 27	265208	-546446	1712540	631	638
318	Kigluaik Mts. 28	603845	-546332	1719870	755	742
319	Kigluaik Mts. 29	945495	-545846	1713130	473	466
320	Kigluaik Mts. 30	2395830	-545373	1716410	534	516
321	Kigluaik Mts. 31	265563	-544919	1713160	602	584
322	Kigluaik Mts. 32	239896	-544466	1713210	540	532
323	Kigluaik Mts. 33	11269100	-543793	1710950	504	506
324	Kigluaik Mts. 34	1086670	-543754	1716480	602	584
325	Kigluaik Mts. 35	620317	-543314	1713790	482	484
326	Kigluaik Mts. 36	565880	-542990	1716690	615	602
327	Kigluaik Mts. 37	1635310	-542393	1709150	644	616
328	Kigluaik Mts. 38	921926	-541982	1716800	547	510
329	Kigluaik Mts. 39	1936210	-540794	1709780	574	572
330	Kigluaik Mts. 40	3896140	-537425	1714250	591	568
331	Kigluaik Mts. 41	1978090	-537097	1718950	599	572
332	Kigluaik Mts. 42	603505	-537076	1708900	534	542
333	Kigluaik Mts. 43	1621690	-536002	1710160	474	486
334	Kigluaik Mts. 44	10382200	-535542	1715940	514	512
335	Kigluaik Mts. 45	3181760	-533963	1720910	650	632
336	Kigluaik Mts. 46	6360750	-532496	1709830	584	582
337	Kigluaik Mts. 47	3992880	-531621	1720650	507	510
338	Kigluaik Mts. 48	3749680	-530474	1719010	576	538
339	Kigluaik Mts. 49	17522600	-530304	1713580	517	524
340	Kigluaik Mts. 50	442153	-528710	1717390	469	482
341	Kigluaik Mts. 51	4983700	-528638	1709410	451	444
342	Kigluaik Mts. 52	904118	-527535	1716890	736	738
343	Kigluaik Mts. 53	409162	-526818	1717260	686	681
344	Kigluaik Mts. 54	14856100	-524089	1716120	606	598
345	Kigluaik Mts. 55	5624480	-523284	1711640	582	574
346	Kigluaik Mts. 56	581571	-521581	1709950	582	580
347	Kigluaik Mts. 57	6338430	-520734	1715720	559	562
348	Kigluaik Mts. 58	1418340	-519043	1716530	500	532
349	Kigluaik Mts. 59	900252	-517501	1716380	642	630
350	Kigluaik Mts. 60	2696110	-516846	1711760	558	550
351	Kigluaik Mts. 61	212751	-515970	1715940	793	790
352	Kigluaik Mts. 62	16893900	-515057	1713780	610	608
353	Kigluaik Mts. 63	1485120	-513201	1716570	587	610
354	Kigluaik Mts. 64	276924	-509353	1714840	707	720
KIOKLUK MOUNTAINS							633.6	34.9829	635.2	38.7453
355	Kiokluk Mts. 01	4.7542e+06	-221322	1.25915e+06	589	596
356	Kiokluk Mts. 02	1.15615e+07	-218896	1.25875e+06	629	632
357	Kiokluk Mts. 03	1.16196e+07	-215247	1.2608e+06	628	626
358	Kiokluk Mts. 04	7.77546e+06	-213169	1.26066e+06	635	622
359	Kiokluk Mts. 05	1.65813e+06	-213147	1.25734e+06	687	700
KOKRINES HILLS							904.833	58.0874	906.167	57.2742
360	Korkines Hills 01	2.59879e+06	-27601.7	1.681e+06	931	918
361	Korkines Hills 02	1.68486e+06	-25981.6	1.68246e+06	872	860
362	Korkines Hills 03	835374	-24331.1	1.68531e+06	872	884
363	Korkines Hills 04	581275	-22935.2	1.6855e+06	830	828
364	Korkines Hills 05	920139	-21994.1	1.68584e+06	862	880
365	Korkines Hills 06	692674	-19007.6	1.68731e+06	894	892
366	Korkines Hills 07	1.33717e+06	-16792.4	1.68603e+06	929	932
367	Korkines Hills 08	685066	-13936.3	1.68652e+06	926	934
368	Korkines Hills 09	306378	-13107.4	1.68694e+06	1055	1052
369	Korkines Hills 10	328691	-12804.5	1.68925e+06	934	942
370	Korkines Hills 11	1.54872e+06	-4869	1.68213e+06	895	892
371	Korkines Hills 12	1.55166e+06	-3335.61	1.68353e+06	858	860
SW KUSKOKWIM MOUNTAINS							740.6	108.558	738	115.888
372	SW Kuskokwim Mts. 01	853911	-284293	1.18483e+06	851	868
373	SW Kuskokwim Mts. 02	1.16035e+06	-282881	1.18325e+06	857	854
374	SW Kuskokwim Mts. 03	1.79793e+06	-268793	1.1808e+06	717	700
375	SW Kuskokwim Mts. 04	1.31306e+06	-268017	1.17918e+06	649	646
376	SW Kuskokwim Mts. 05	896495	-267619	1.17835e+06	629	622
LOCKWOOD HILLS							822.5	15.2862	819	21.0713
377	Lockwood Hills 01	697121	-111231	1854830	838	826
378	Lockwood Hills 02	1162990	-109881	1854810	812	820
379	Lockwood Hills 03	1297470	-109777	1857370	807	790
380	Lockwood Hills 04	744061	-105216	1854480	833	840
MERTIE MOUNTAINS							1347.74	59.4036	1306.06	212.946
381	Mertie Mts. 01	7.6877e+06	478734	1.6817e+06	1310	1298
382	Mertie Mts. 02	5.40598e+06	481494	1.6823e+06	1300	1288
383	Mertie Mts. 03	8.20358e+06	481765	1.69318e+06	1344	1316
384	Mertie Mts. 04	7.3311e+06	482408	1.67774e+06	1434	1422
385	Mertie Mts. 05	6.20347e+06	482800	1.62725e+06	1323	1326
386	Mertie Mts. 06	9.26985e+06	483349	1.68786e+06	1401	1384
387	Mertie Mts. 07	2.9531e+06	483959	1.6945e+06	1355	1328
388	Mertie Mts. 08	2.9144e+06	485698	1.6944e+06	1324	1322
389	Mertie Mts. 09	1.53783e+07	486745	1.62616e+06	1340	1318
390	Mertie Mts. 10	2.64636e+06	487087	1.68606e+06	1461	1464
391	Mertie Mts. 11	9.22592e+06	487267	1.6901e+06	1354	1346
392	Mertie Mts. 12	4.26301e+06	489807	1.6437e+06	1209	1232
393	Mertie Mts. 13	1.12378e+07	492079	1.62733e+06	1338	1326
394	Mertie Mts. 14	3.81909e+06	495346	1.64565e+06	1300	1302
395	Mertie Mts. 15	9.04797e+06	496176	1.63379e+06	1305	1298
396	Mertie Mts. 16	7.91483e+06	496442	1.63751e+06	1287	1284
397	Mertie Mts. 17	7.62087e+06	496940	1.64377e+06	1310	1298
398	Mertie Mts. 18	5.59789e+06	498909	1.62953e+06	1318	1336
399	Mertie Mts. 19	4.52031e+06	500908	1.63975e+06	1296	1314
400	Mertie Mts. 20	7.26399e+06	501264	1.63694e+06	1339	1336
401	Mertie Mts. 21	6.14563e+06	505893	1.67579e+06	1349	1336
402	Mertie Mts. 22	7.56284e+06	507242	1.67875e+06	1385	1372
403	Mertie Mts. 23	3.75332e+06	509944	1.67381e+06	1426	124
404	Mertie Mts. 24	1.73543e+07	510756	1.68191e+06	1377	1370
405	Mertie Mts. 25	1.27512e+07	524879	1.70171e+06	1312	1310
406	Mertie Mts. 26	1.21125e+07	529849	1.70202e+06	1310	1292
407	Mertie Mts. 27	2.1863e+06	535579	1.70336e+06	1518	1520
408	Mertie Mts. 28	5.91593e+06	537884	1.69743e+06	1394	1382
409	Mertie Mts. 29	5.60474e+06	540138	1.69673e+06	1348	1346
410	Mertie Mts. 30	6.94743e+06	540606	1.69247e+06	1384	1376
411	Mertie Mts. 31	6.72378e+06	575478	1.69603e+06	1336	1348
412	Mertie Mts. 32	3.22289e+06	576353	1.69241e+06	1405	1398
413	Mertie Mts. 33	2.62685e+06	577462	1.70006e+06	1271	1278
414	Mertie Mts. 34	3.24992e+06	578062	1.69407e+06	1412	1404
415	Mertie Mts. 35	3.5663e+06	579382	1.69742e+06	1296	1318
PURCELL MOUNTAINS							774.385	46.8215	776.462	42.1043
416	Purcell Mts. 01	517123	-159073	1821362	846	828
417	Purcell Mts. 02	373794	-157999	1820771	804	822
418	Purcell Mts. 03	527109	-153899	1813857	835	832
419	Purcell Mts. 04	596265	-153779	1814631	734	726
420	Purcell Mts. 05	534034	-151841	1811923	755	758
421	Purcell Mts. 06	2014244	-146516	1822233	716	724
422	Purcell Mts. 07	427790	-143939	1808881	702	724
423	Purcell Mts. 08	266037	-142218	1812502	774	766
424	Purcell Mts. 09	304936	-141898	1820551	809	802
425	Purcell Mts. 10	832266	-129280	1801188	807	804
426	Purcell Mts. 11	603510	-128623	1801678	808	816
427	Purcell Mts. 12	252064	-128268	1802039	737	754
428	Purcell Mts. 13	652515	-127833	1800479	740	738
RAY MOUNTAINS							1141.5	83.6472	1148.25	83.6007
429	Ray Mts. 01	2.64454e+06	114467	1.75478e+06	1100	1098
430	Ray Mts. 02	450084	130324	1.7575e+06	1107	1104
431	Ray Mts. 03	651542	132960	1.74927e+06	1028	1066
432	Ray Mts. 04	1.31968e+06	133856	1.74935e+06	1058	1056
433	Ray Mts. 05	247955	135965	1.75405e+06	1213	1220
434	Ray Mts. 06	225781	137747	1.75499e+06	1147	1144
435	Ray Mts. 07	276492	139760	1.75147e+06	1270	1292
436	Ray Mts. 08	610780	140802	1.75178e+06	1209	1206
RUSSIAN MOUNTAINS							657.4	81.2853	654.8	80.5307
437	Russian Mts. 01	2.74113e+06	-271825	1.30996e+06	638	640
438	Russian Mts. 02	247210	-271515	1.3065e+06	549	546
439	Russian Mts. 03	3.54909e+06	-269276	1.30917e+06	625	622
440	Russian Mts. 04	493350	-268029	1.30847e+06	723	716
441	Russian Mts. 05	342090	-267533	1.30972e+06	752	750
SHOTGUN HILLS							585.5	67.1751	576	70.7107
442	Shotgun Hills 01	1.7751e+06	-228774	1.16463e+06	633	626
443	Shotgun Hills 02	1.01035e+06	-222007	1.17104e+06	538	526
WEST POINT							1235.75	40.0531	1228	37.4166
444	West Point 01	7.1307e+06	432340	1.69779e+06	1228	1220
445	West Point 02	8.27509e+06	434450	1.70285e+06	1217	1214
446	West Point 03	7.25256e+06	436445	1.70149e+06	1204	1196
447	West Point 04	6.61607e+06	437995	1.69853e+06	1294	1282
WHITE MOUNTAINS							1186.86	45.9726	1187.71	49.5773
448	White Mts. 01	309048	344676	1.73853e+06	1214	1206
449	White Mts. 02	390833	345470	1.74002e+06	1135	1132
450	White Mts. 03	930636	347979	1.73944e+06	1176	1168
451	White Mts. 04	505597	348885	1.74381e+06	1238	1246
452	White Mts. 05	120906	349281	1.7424e+06	1244	1252
453	White Mts. 06	853730	349899	1.74018e+06	1133	1130
454	White Mts. 07	221505	350063	1.74364e+06	1168	1180
YORK MOUNTAINS							477.2	84.6091	478.8	90.9351
455	York Mts. 01	357988	-612002	1.78623e+06	458	450
456	York Mts. 02	646035	-611319	1.78441e+06	370	362
457	York Mts. 03	261478	-604218	1.7914e+06	565	578
458	York Mts. 04	445713	-603763	1787532	432	440
459	York Mts. 05	469289	-602907	1.79138e+06	561	564
ZANE HILLS							774.476	93.6208	780.095	89.5622
460	Zane Hills 01	1.86409e+06	-104475	1.82612e+06	950	938
461	Zane Hills 02	1.64831e+06	-104124	1.82754e+06	843	840
462	Zane Hills 03	3.38667e+06	-102746	1.82317e+06	688	700
463	Zane Hills 04	4.0272e+06	-101469	1.8281e+06	680	678
464	Zane Hills 05	2.20609e+06	-99905.1	1.82619e+06	596	624
465	Zane Hills 06	1.25695e+06	-99568.1	1.82374e+06	681	688
466	Zane Hills 07	1.05982e+06	-99444.9	1.81732e+06	803	830
467	Zane Hills 08	4.64305e+06	-99180.8	1.82111e+06	693	700
468	Zane Hills 09	5.31424e+06	-97110.7	1.82023e+06	678	680
469	Zane Hills 10	3.30112e+06	-95238.1	1.81798e+06	733	736
470	Zane Hills 11	2.80058e+06	-94252.5	1.80827e+06	860	868
471	Zane Hills 12	2.18652e+06	-93588.5	1.81701e+06	731	754
472	Zane Hills 13	541501	-92348.3	1.80483e+06	772	770
473	Zane Hills 14	985427	-92120.6	1.81626e+06	826	838
474	Zane Hills 15	2.46497e+06	-91543.4	1.80936e+06	940	942
475	Zane Hills 16	1.52535e+06	-91424.4	1.80285e+06	767	760
476	Zane Hills 17	571306	-91234.8	1.79878e+06	796	814
477	Zane Hills 18	2.47015e+06	-90526.8	1.81681e+06	730	732
478	Zane Hills 19	498580	-90103.7	1.80862e+06	921	914
479	Zane Hills 20	1.11807e+06	-87618.3	1.80407e+06	769	762
480	Zane Hills 21	2.50355e+06	-86693.1	1.81424e+06	807	814

## Sheet: LIA ELA data
a.) Data are sorted by ID number. A-G denote different LIA glaciers within the catchment of each LGM glacier (e.g., Glacier 52 has four LIA glaciers; therefore these are listed 052A, 052B, 052C, 052D). b.) Unofficial reference name given to each glacier in this study, which refers to the LGM glacier. LIA A - G refer to the individual LIA glaciers within the catchment of that LGM glacier. c.) glac…
ID number a	Glacier name (unofficial) b	Area (m^2) c	X (m) d	Y (m) e	ELA_LIA AAR (m asl) f	ELA_LIA AABR (m asl) g	LIA mean AAR (m asl) h	AAR standard deviation (m) i	LIA mean AABR (m asl) j	AABR standard deviation (m) k
WESTERN ALASKA RANGE
WESTERN ALASKA RANGE 01							-	-	-	-
047A	Western Alaska Range 01 LIA A	8.60062e+06	-11858.4	1.29778e+06	1477	1475
WESTERN ALASKA RANGE 04							-	-	-	-
050A	Western Alaska Range 04 LIA A	912875	-8524.5	1.25756e+06	1230	1298
WESTERN ALASKA RANGE 05							1365.5	7.77817	1421	2.82843
051A	Western Alaska Range 05 LIA A	4.06396e+06	-1108.9	1.26547e+06	1371	1419
051B	Western Alaska Range 05 LIA B	3.30168e+06	-2787	1.27273e+06	1360	1423
051C	Western Alaska Range 05 LIA C	2.82431e+06	-3759.49	1.2647e+06	1478	1456
051D	Western Alaska Range 05 LIA D	2.56826e+06	-517.276	1.26273e+06	1488	1516
051E	Western Alaska Range 05 LIA E	540081	-49.521	1.26051e+06	1346	1399
051F	Western Alaska Range 05 LIA F	870450	-5724.47	1.25793e+06	1393	1376
WESTERN ALASKA RANGE 06							1475	108.821	1483	122.21
052A	Western Alaska Range 06 LIA A	7.49056e+06	350.976	1.28083e+06	1525	1568
052B	Western Alaska Range 06 LIA B	1.70767e+07	3706.31	1.28703e+06	1604	1607
052C	Western Alaska Range 06 LIA C	1.18361e+07	5361.86	1.29468e+06	1372	1365
052D	Western Alaska Range 06 LIA D	1.30172e+06	-5888.17	1.27369e+06	1399	1392
CENTRAL ALASKA RANGE
CENTRAL ALASKA RANGE 01							1395.5	6.36396	1406	31.1127
053A	Central Alaska Range 01 LIA A	1.8033e+06	61689.3	1.40335e+06	1400	1428
053B	Central Alaska Range 01 LIA B	1.0347e+06	63306.8	1.40401e+06	1391	1384
CENTRAL ALASKA RANGE 02							-	-	-	-
054A	Central Alaska Range 02 LIA A	1.0614e+07	94309.7	1.43451e+06	1630	1708
CENTRAL ALASKA RANGE 03							1546.5	95.4594	1582	106.066
055A	Central Alaska Range 03 LIA A	2.39795e+07	113853	1.44225e+06	1614	1657
055B	Central Alaska Range 03 LIA B	7.53512e+07	105330	1.43358e+06	1479	1507
CENTRAL ALASKA RANGE 04							-	-	-	-
056A	Central Alaska Range 04 LIA A	5.57539e+07	121811	1.44921e+06	1614	1912
CENTRAL ALASKA RANGE 05
057A	Central Alaska Range 05 LIA A	3.99548e+07	134010	1.46218e+06	1619	1687	-	-	-	-
CENTRAL ALASKA RANGE 06
058A	Central Alaska Range 06 LIA A	861590	158894	1.47644e+06	1825	1838
CENTRAL ALASKA RANGE 09							-	-	-	-
061A	Central Alaska Range 09 LIA A	1.58579e+06	208041	1.50445e+06	1686	1749
CENTRAL ALASKA RANGE 10							1688.5	72.832	1729	33.9411
062A	Central Alaska Range 10 LIA A	7.88683e+06	211258	1.50232e+06	1637	1705
062B	Central Alaska Range 10 LIA B	1.30342e+06	209259	1.50551e+06	1740	1753
CENTRAL ALASKA RANGE 11							1591	52.1632	1620.67	24.5832
063A	Central Alaska Range 11 LIA A	1.17104e+07	215129	1.50342e+06	1532	1595
063B	Central Alaska Range 11 LIA B	1.71831e+06	217478	1.50817e+06	1631	1644
063C	Central Alaska Range 11 LIA C	1.20425e+06	213485	1.50663e+06	1610	1623
EASTERN ALASKA RANGE
EASTERN ALASKA RANGE 01							1812.67	52.653	1822.33	55.1574
064A	Eastern Alaska Range 01 LIA A	351332	285367	1.55736e+06	1873	1886
064B	Eastern Alaska Range 01 LIA B	209366	284167	1.55725e+06	1776	1789
064C	Eastern Alaska Range 01 LIA C	638789	283598	1.55715e+06	1789	1792
EASTERN ALASKA RANGE 02							1919.25	107.976	1927.88	94.3556
065A	Eastern Alaska Range 02 LIA A	1.41377e+06	330807	1.55101e+06	1861	1884
065B	Eastern Alaska Range 02 LIA B	1.6231e+06	329044	1.55012e+06	2056	2029
065C	Eastern Alaska Range 02 LIA C	1.74497e+06	327226	1.54847e+06	1819	1867
065D	Eastern Alaska Range 02 LIA D	1.64922e+06	325400	1.54837e+06	1863	1861
065E	Eastern Alaska Range 02 LIA E	787374	324558	1.54716e+06	1948	1946
065F	Eastern Alaska Range 02 LIA F	622678	326397	1.54674e+06	2078	2076
065G	Eastern Alaska Range 02 LIA G	1.77589e+06	326321	1.54424e+06	1949	1967
065H	Eastern Alaska Range 02 LIA H	8.19852e+06	324589	1.54143e+06	1780	1793
EASTERN ALASKA RANGE 03							-	-	-	-
066A	Eastern Alaska Range 03 LIA A	555160	332373	1.55128e+06	1814	1857
EASTERN ALASKA RANGE 04							1550	117.38	1758	110.309
067A	Eastern Alaska Range 04 LIA A	9.23055e+07	373257	1.53834e+06	1467	1680
067B	Eastern Alaska Range 04 LIA B	7.60764e+07	359283	1.54242e+06	1633	1836
EASTERN ALASKA RANGE 05							1734	171.432	1775.33	152.422
068A	Eastern Alaska Range 05 LIA A	4.43777e+06	416562	1.53617e+06	1802	1815
068B	Eastern Alaska Range 05 LIA B	5.13655e+06	414974	1.5308e+06	1861	1904
068C	Eastern Alaska Range 05 LIA C	9.99974e+06	413283	1.52847e+06	1539	1607
EASTERN ALASKA RANGE 11							-	-	-	-
074A	Eastern Alaska Range 11 LIA A	6.35348e+07	428930	1.52979e+06	1678	1646
EASTERN ALASKA RANGE 13							-	-	-	-
076A	Eastern Alaska Range 13 LIA A	1.88488e+06	464954	1.53902e+06	1843	1866
EASTERN ALASKA RANGE 14							1946.67	57.0117	1964.67	39.6274
077A	Eastern Alaska Range 14 LIA A	2.62564e+06	467094	1.53721e+06	1889	1927
077B	Eastern Alaska Range 14 LIA B	4.47708e+06	468036	1.53591e+06	2003	2006
077C	Eastern Alaska Range 14 LIA C	1.85746e+06	466371	1.53802e+06	1948	1961
EASTERN ALASKA RANGE 16							1556.6	160.541	1580.6	158.072
079A	Eastern Alaska Range 16 LIA A	1.57144e+07	485447	1.50255e+06	1598	1621
079B	Eastern Alaska Range 16 LIA B	2.64082e+06	485375	1.50715e+06	1759	1767
079C	Eastern Alaska Range 16 LIA C	6.09221e+07	458048	1.51167e+06	1379	1387
079D	Eastern Alaska Range 16 LIA D	4.08954e+06	485761	1.50912e+06	1639	1677
079E	Eastern Alaska Range 16 LIA E	5.14656e+07	475005	1.50943e+06	1408	1451
EASTERN ALASKA RANGE 39							-	-	-	-
102A	Eastern Alaska Range 39 LIA A	326681	660096	1.41848e+06	2000	2018
ROMANZOF MOUNTAINS
ROMANZOF MTS 01							1857	46.669	1865.5	0.707107
242A	Romanzof Mts. 01 LIA A	1.9682e+06	401531	2.18217e+06	1890	1866
242B	Romanzof Mts. 01 LIA B	158429	402311	2.18375e+06	1824	1865
KIGLUAIK MOUNTAINS
KIGLUAIK MOUNTAINS 44							-	-	-	-
334A	Kigluaik Mts. 44 LIA A	208068	-532602	1.71682e+06	750	756

## Sheet: ∆ELA_temp data
a.) Data are sorted by ID number. b.) unofficial reference name assigned to each glacier in this study. c.) ELA calculated for LGM glacier using AAR. d.) standard error for ELAs calculated with AAR (Oien et al., 2021). e.) ELA calculated for LGM glacier using AABR. f.) standard error for ELAs calculated with AABR (Oien et al., 2021). g.) ELA calculated for LIA glacier(s) within the catchment of t…
		ELA_LGM AAR		ELA_LGM AABR		ELA_LIA AAR		ELA_LIA AABR		∆ELA AAR		∆ELA AABR		AAR ∆ELA temperature depressions (°C) o						AABR ∆ELA temperature depressions (°C) p
														modern min. lapse rate (4.2 °C/km)		modern max. lapse rate (6.3 °C/km)		dry adiabatic lapse rate 9.8 °C/km		modern min. lapse rate (4.2 °C/km)		modern max. lapse rate (6.3 °C/km)		dry adiabatic lapse rate (9.8 °C/km)
ID number a	Glacier name (unofficial) b	ELA_LGM AAR (m asl) c	ELA_LGM AAR error (m) d	ELA_LGM AABR (m asl) e	ELA_LGM AABR error (m) f	ELA_LIA AAR (m asl) g	ELA_LIA AAR error (m) h	ELA_LIA AABR (m asl) i	ELA_LIA AABR error (m) j	∆ELA AAR (m) k	∆ELA AAR error (m) l	∆ELA AABR (m) m	∆ELA AABR error (m) n	°C	± °C	°C	± °C	°C	± °C	°C	± °C	°C	± °C	°C	± °C
WESTERN ALASKA RANGE
047	Western Alaska Range 01	1075	66.5	1078	65.5	1477	66.5	1475	65.5	-402	133	-397	131	-1.6884	0.5586	-2.5326	0.8379	-3.9396	1.3034	-1.6674	0.5502	-2.5011	0.8253	-3.8906	1.2838
050	Western Alaska Range 04	1103	66.5	1106	65.5	1230	66.5	1298	65.5	-127	133	-192	131	-0.5334	0.5586	-0.8001	0.8379	-1.2446	1.3034	-0.8064	0.5502	-1.2096	0.8253	-1.8816	1.2838
051	Western Alaska Range 05	1092	66.5	1130	65.5	1366*	8*	1421*	3*	-273.5	74.2782	-291	68.3284	-1.1487	0.311968	-1.72305	0.467952	-2.6803	0.727926	-1.2222	0.286979	-1.8333	0.430469	-2.8518	0.669619
052	Western Alaska Range 06	1140	66.5	1148	65.5	1475*	109*	1483*	122*	-335	175.321	-335	187.71	-1.407	0.736348	-2.1105	1.10452	-3.283	1.71815	-1.407	0.788383	-2.1105	1.18257	-3.283	1.83956
CENTRAL ALASKA RANGE
053	Central Alaska Range 01	1249	66.5	1207	65.5	1396*	6*	1406*	31*	-146.5	72.864	-199	96.6127	-0.6153	0.306029	-0.92295	0.459043	-1.4357	0.714067	-0.8358	0.405773	-1.2537	0.60866	-1.9502	0.946804
054	Central Alaska Range 02	1080	66.5	1218	65.5	1630	66.5	1708	65.5	-550	133	-490	131	-2.31	0.5586	-3.465	0.8379	-5.39	1.3034	-2.058	0.5502	-3.087	0.8253	-4.802	1.2838
055	Central Alaska Range 03	1238	66.5	1311	65.5	1547*	95*	1582*	106*	-308.5	161.959	-271	171.566	-1.2957	0.68023	-1.94355	1.02034	-3.0233	1.5872	-1.1382	0.720577	-1.7073	1.08087	-2.6558	1.68135
056	Central Alaska Range 04	1144	66.5	1262	65.5	1614	66.5	1912	65.5	-470	133	-650	131	-1.974	0.5586	-2.961	0.8379	-4.606	1.3034	-2.73	0.5502	-4.095	0.8253	-6.37	1.2838
057	Central Alaska Range 05	1092	66.5	1220	65.5	1619	66.5	1687	65.5	-527	133	-467	131	-2.2134	0.5586	-3.3201	0.8379	-5.1646	1.3034	-1.9614	0.5502	-2.9421	0.8253	-4.5766	1.2838
058	Central Alaska Range 06	1254	66.5	1272	65.5	1825	66.5	1838	65.5	-571	133	-566	131	-2.3982	0.5586	-3.5973	0.8379	-5.5958	1.3034	-2.3772	0.5502	-3.5658	0.8253	-5.5468	1.2838
061	Central Alaska Range 09	1422	66.5	1490	65.5	1686	66.5	1749	65.5	-264	133	-259	131	-1.1088	0.5586	-1.6632	0.8379	-2.5872	1.3034	-1.0878	0.5502	-1.6317	0.8253	-2.5382	1.2838
062	Central Alaska Range 10	1477	66.5	1535	65.5	1689*	73*	1729*	34*	-211.5	139.332	-194	99.4411	-0.8883	0.585194	-1.33245	0.877792	-2.0727	1.36545	-0.8148	0.417653	-1.2222	0.626479	-1.9012	0.974523
063	Central Alaska Range 11	1500	66.5	1528	65.5	1591*	52*	1621*	25*	-91	118.663	-92.6667	90.0832	-0.3822	0.498385	-0.5733	0.747578	-0.8918	1.1629	-0.3892	0.378349	-0.5838	0.567524	-0.908133	0.882815
EASTERN ALASKA RANGE
064	Eastern Alaska Range 01	1432	66.5	1405	65.5	1813*	53*	1822*	55*	-380.667	119.153	-417.333	120.657	-1.5988	0.500442	-2.3982	0.750664	-3.73053	1.1677	-1.7528	0.506761	-2.6292	0.760141	-4.08987	1.18244
065	Eastern Alaska Range 02	1587	66.5	1565	65.5	1919*	108*	1928*	94*	-332.25	174.476	-362.875	159.856	-1.39545	0.732799	-2.09318	1.0992	-3.25605	1.70986	-1.52408	0.671394	-2.28611	1.00709	-3.55618	1.56659
066	Eastern Alaska Range 03	1364	66.5	1432	65.5	1814	66.5	1857	65.5	-450	133	-425	131	-1.89	0.5586	-2.835	0.8379	-4.41	1.3034	-1.785	0.5502	-2.6775	0.8253	-4.165	1.2838
067	Eastern Alaska Range 04	1485	66.5	1533	65.5	1550*	117*	1758*	110*	-65	183.88	-225	175.809	-0.273	0.772295	-0.4095	1.15844	-0.637	1.80202	-0.945	0.738396	-1.4175	1.10759	-2.205	1.72292
068	Eastern Alaska Range 05	1357	66.5	1370	65.5	1734*	171*	1775*	152*	-377	237.932	-405.333	217.922	-1.5834	0.999315	-2.3751	1.49897	-3.6946	2.33174	-1.7024	0.915271	-2.5536	1.37291	-3.97227	2.13563
074	Eastern Alaska Range 11	1290	66.5	1298	65.5	1678	66.5	1646	65.5	-388	133	-348	131	-1.6296	0.5586	-2.4444	0.8379	-3.8024	1.3034	-1.4616	0.5502	-2.1924	0.8253	-3.4104	1.2838
076	Eastern Alaska Range 13	1131	66.5	1244	65.5	1843	66.5	1866	65.5	-712	133	-622	131	-2.9904	0.5586	-4.4856	0.8379	-6.9776	1.3034	-2.6124	0.5502	-3.9186	0.8253	-6.0956	1.2838
077	Eastern Alaska Range 14	1290	66.5	1390	65.5	1947*	57*	1965*	40*	-656.667	123.512	-574.667	105.127	-2.758	0.518749	-4.137	0.778124	-6.43533	1.21041	-2.4136	0.441535	-3.6204	0.662303	-5.63173	1.03025
079	Eastern Alaska Range 16	1515	66.5	1453	65.5	1557*	161*	1581*	158*	-41.6	227.041	-127.6	223.572	-0.17472	0.953571	-0.26208	1.43036	-0.40768	2.225	-0.53592	0.939003	-0.80388	1.4085	-1.25048	2.19101
102	Eastern Alaska Range 39	1560	66.5	1543	65.5	2000	66.5	2018	65.5	-440	133	-475	131	-1.848	0.5586	-2.772	0.8379	-4.312	1.3034	-1.995	0.5502	-2.9925	0.8253	-4.655	1.2838
ROMANZOF MOUNTAINS
242	Romanzof Mts. 01	1614	66.5	1596	65.5	1857*	46.669	1866*	1*	-243	113.169	-269.5	66.2071	-1.0206	0.47531	-1.5309	0.712965	-2.3814	1.10906	-1.1319	0.27807	-1.69785	0.417105	-2.6411	0.64883
KIGLUAIK MOUNTAINS
334	Kigluaik Mts. 44	514	66.5	512	65.5	750	66.5	756	65.5	-236	133	-244	131	-0.9912	0.5586	-1.4868	0.8379	-2.3128	1.3034	-1.0248	0.5502	-1.5372	0.8253	-2.3912	1.2838
